# Supplementary material
Source: Springer Nature journal article supplement (https://www.springermedizin.de/resource/supplementary/12885_2010_2531_MOESM5_ESM.pdf/9462230)

# tumour volume after 3 and 5 weeks

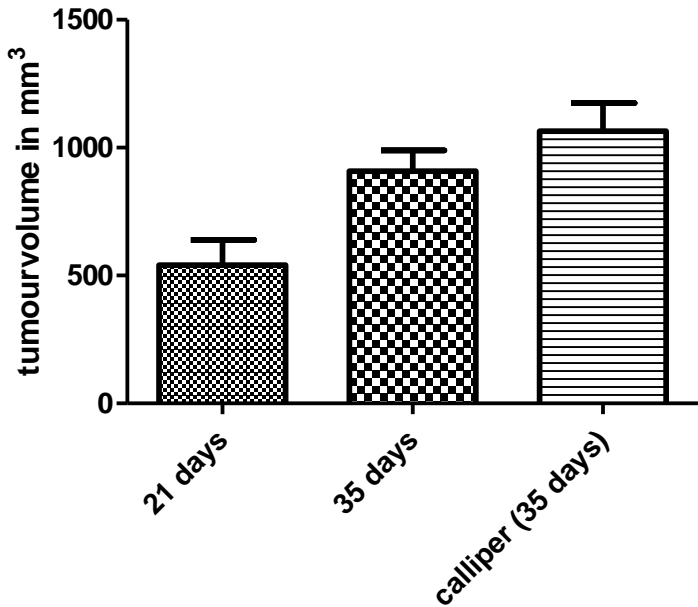

Supplement: MOESM5 [file 9462230]
